# Supplementary material
Source: MDPI journal article supplement (https://www.mdpi.com/2304-6767/10/7/119)
Supplement: s1 [file s1]

Table S1: Distribution of the types of lasers used by geographic location of the Dental Schools.

| Type of Laser | Canada   | Midwest US | Northeast US | Southeast US | Southwest US | West US  | p-value |
|---------------|----------|------------|--------------|--------------|--------------|----------|---------|
| <b>CO2</b>    |          |            |              |              |              |          |         |
| Yes           | ---      | ---        | 4 (57.1)     | 2 (28.6)     | 1 (14.3)     | ---      | 0.1102  |
| No            | 2 (16.7) | 5 (41.7)   | 2 (16.7)     | 2 (16.7)     | ---          | 1 (8.33) |         |
| <b>DIODE</b>  |          |            |              |              |              |          |         |
| Yes           | 2 (11.7) | 4 (23.5)   | 5 (29.4)     | 4 (23.5)     | 1 (5.9)      | 1 (5.9)  | 0.7765  |
| No            | ---      | 1 (50.0)   | 1 (50.0)     | ---          | ---          | ---      |         |
| <b>ERBIUM</b> |          |            |              |              |              |          |         |
| Yes           | 1 (14.3) | 1 (14.3)   | 5 (71.4)     | ---          | ---          | ---      | 0.0342* |
| No            | 1 (8.3)  | 4 (33.3)   | 1 (8.3)      | 4 (33.3)     | 1 (8.3)      | 1 (8.3)  |         |
| <b>NdYAG</b>  |          |            |              |              |              |          |         |
| Yes           | ---      | 3 (30.0)   | 3 (30.0)     | 2 (20.0)     | 1 (10.0)     | 1 (10.0) | 0.2911  |
| No            | 2 (22.2) | 2 (22.2)   | 3 (33.3)     | 2 (22.2)     | ---          | ---      |         |

Table S2: The DIODE Laser used for various periodontal procedures in US and Canada.

| Laser Type   | PERIODONTAL PROCEDURES<br>(N=19) |           | p-value |
|--------------|----------------------------------|-----------|---------|
|              | Yes n(%)                         | No n(%)   |         |
| <b>DIODE</b> | <b>BIOPSIES</b>                  |           | 0.3216  |
| Yes          | 8 (47.1)                         | 9 (52.9)  |         |
| No           | ---                              | 2 (100.0) |         |
| <b>DIODE</b> | <b>BIOSTIMULATION</b>            |           | 0.5438  |
| Yes          | 5 (29.4)                         | 12 (70.6) |         |
| No           | 1 (50.0)                         | 1 (50.0)  |         |
| <b>DIODE</b> | <b>FRENECTOMY</b>                |           | 0.0351* |
| Yes          | 15 (88.2)                        | 2 (11.8)  |         |
| No           | ---                              | 2 (100.0) |         |
| <b>DIODE</b> | <b>GINGIVECTOMY</b>              |           |         |
| Yes          | 13 (76.5)                        | 4 (23.5)  |         |
| No           | ---                              | 2 (100.0) |         |

|              |                               |          |        |
|--------------|-------------------------------|----------|--------|
|              |                               |          | 0.0877 |
| <b>DIODE</b> | <b>IMPLANT TREATMENTS</b>     |          | 0.5322 |
| Yes          | 12 (70.6)                     | 5 (29.4) |        |
| No           | 2 (100.0)                     | ---      |        |
| <b>DIODE</b> | <b>PERIODONTAL TREATMENTS</b> |          | 0.8947 |
| Yes          | 16 (94.1)                     | 1 (5.8)  |        |
| No           | 2 (100.0)                     | ---      |        |

\*p<0.05

Table S3: Distribution of the number of hours of didactic laser training in Graduate Periodontics Programs in US and Canada.

| <b>No. of Hours of Didactic Training</b> | <b>Canada</b> | <b>Midwest US</b> | <b>Northeast US</b> | <b>Southeast US</b> | <b>Southwest US</b> | <b>West US</b> |
|------------------------------------------|---------------|-------------------|---------------------|---------------------|---------------------|----------------|
| <b>0</b>                                 | ---           | 2 (100.0)         | ---                 | ---                 | ---                 | ---            |
| <b>1 – 3</b>                             | 1 (25.0)      | 3 (75.0)          | ---                 | ---                 | ---                 | ---            |
| <b>4 – 6</b>                             | 1 (16.7)      | ---               | 1 (16.7)            | 3 (50.0)            | 1 (16.7)            | ---            |
| <b>7 – 12</b>                            | ---           | ---               | ---                 | ---                 | ---                 | 1 (100.0)      |
| <b>Over 12</b>                           | ---           | ---               | 5 (83.3)            | 1 (16.67)           | ---                 | ---            |
